# Supplementary material for: Tailored high cycling performance in a solid polymer electrolyte with perovskite-type Li0.33La0.557TiO3 nanofibers for all-solid-state lithium ion batteries
Source: Royal Society of Chemistry journal article supplement (doi:10.1039/c9dt00074g), 2019-01-01
Supplement: c9dt00074g1.pdf [file c9dt00074g1.pdf]

## Supporting Information for

### Tailored highly cycling performance in solid polymer electrolyte with perovskite-type $\text{Li}_{0.33}\text{La}_{0.557}\text{TiO}_3$ nanofibers for all-solid-state lithium ion battery

Kang-Qiang He,<sup>a,b</sup> Jun-Wei Zha,<sup>\*a,b</sup> Peng Du,<sup>a</sup> Samson Ho-Sum Cheng,<sup>a,d</sup> Chen Liu,<sup>d</sup> Zhi-Min Dang,<sup>c</sup> Robert K.Y. Li<sup>\*a</sup>

a. Department of Materials Science and Technology, City University of Hong Kong, Hong Kong, China.

b. School of Chemistry and Biological Engineering, University of Science and Technology Beijing, Beijing 100083, PR China.

c. State Key Laboratory of Power System, Department of Electrical Engineering, Tsinghua University, Beijing 100084, PR China

d. College of Materials Science & Engineering, Shenzhen University, Shenzhen, 581000, P. R. China

\*Correspondence to: zhajw@ustb.edu.cn

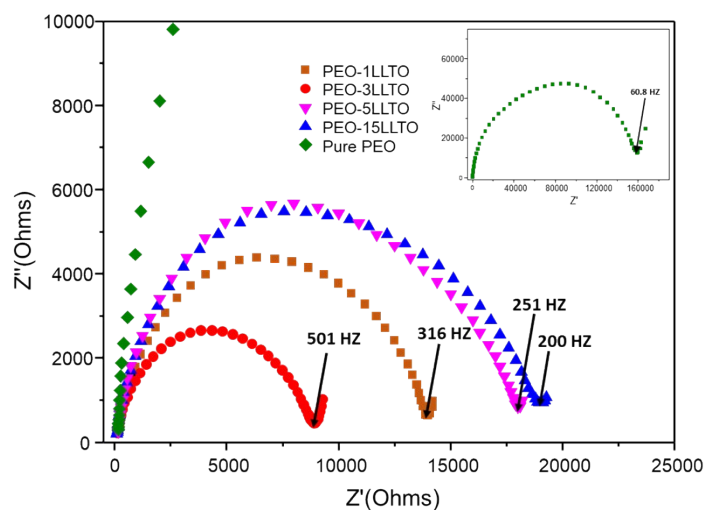

Figure S1. EIS results of PEO and composite electrolytes with different LLTO nanofiber amount at room temperature (the inset is the individual EIS figure for the Pure PEO electrolyte).

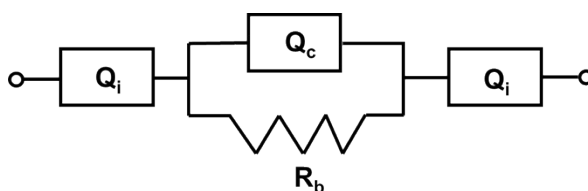

Figure S2. Equivalent circuit used for EIS data fitting of SS/CPEs/SS symmetric cells.

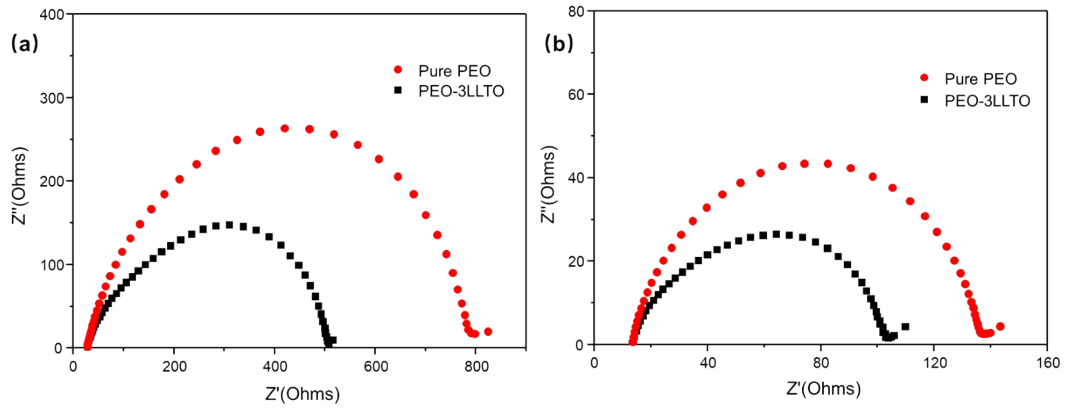

Figure S3. Electrochemical impedance spectra of Li/PEO/Li and Li/PEO-3LLTO/Li symmetric cells obtained at (a) 60°C and (b) 80°C after polarization.

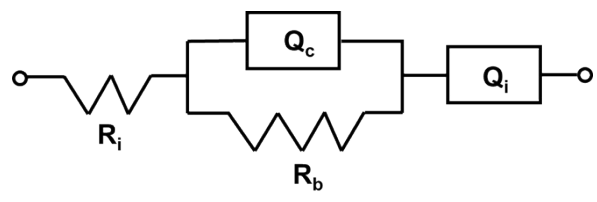

Figure S4. Equivalent circuit used for EIS data fitting of Li/CPEs/Li symmetric cells.
